# Supplementary material for: Spatiotemporal distribution of seasonal snow water equivalent in High-Mountain Asia from an 18-year Landsat-MODIS era snow reanalysis dataset
Source: Copernicus journal article supplement (doi:10.5194/tc-2021-139), 2021-05-17
Supplement: Supplementary file [file tc-2021-139-AC2-supplement.pdf]

We would like to thank the reviewer for the very helpful and constructive comments in suggesting improvements in our original manuscript. Below we provide point-by-point responses to the comments, where any proposed changes would be finalized during the revision of the manuscript made in the next stage.

**Reviewer # 2:**

**Major comments:**

1) I understand the need for a non-seasonal snow mask (based on the remotely-sensed snow cover constraint) but only examining the unmasked areas limits the utility of the analysis and makes the results difficult to compare with other studies. The authors should consider using the modeled melt instead of peak SWE, which should be valid over all the pixels, for the analysis presented in the results.

The reanalysis method will generally work best for seasonal snow where there is a strong signature between snow disappearance and measured fSCA. Therefore, we provide the caveat that non-seasonal snow pixels are likely significantly more erroneous than the seasonal snow pixels. The use of a non-seasonal vs. seasonal snow mask is used in this paper to highlight the part of snow storage that is deemed seasonal snow. In the raw dataset, all pixels are provided and so users are free to take advantage of the non-seasonal snow estimates (with the caveat mentioned above), but for the purposes of highlighting a new estimate of seasonal snow climatology in this paper we prefer to focus on seasonal snow alone. This will be clarified in the revised manuscript.

2) The authors acknowledge that missing snow cover observations due to clouds will cause higher uncertainty, but do not acknowledge the errors of omission and commission in cloud snow discrimination. These errors will lead to snow that disappears too early or that melts out too late. I'd like to see some discussion of how these errors propagate and are addressed.

More discussion and references to previous work on the methodology and other sources will be provided on the impact of clouds and fSCA measurement in the revised manuscript. In summary, the method uses a conservative cloud screening (as outlined in Margulis et al., 2019 and described in more detail below) to limit inclusion of cloudy scenes. This does not prevent errors of omission/commission, but is meant to limit them by mostly including what are most likely high-quality/clear-sky images. Moreover, the reanalysis, unlike other deterministic methods, specifies measurement error in the fSCA time series. This also buffers against direct propagation of fSCA errors into the SWE estimates. More details on this are provided below in response to other comments.

3) Analysis of a spatial timeseries of the datasets show videos of the SWE as being unbelievably smooth and therefore not representing ephemeral snow accurately.

It is acknowledged that the reanalysis method is best designed for non-ephemeral snow where there is a strong seasonal cycle and signal between snow disappearance and measured fSCA that can be captured at the frequency of the fSCA measurements. Hence it is not surprising that ephemeral snow is not well captured. That said, the posterior estimates from the reanalysis tend to be much less smooth than the prior estimates via the incorporation spatial information contained in the fSCA measurements. Forward modeling estimates (i.e. like that of the prior) tend to be much smoother than those that incorporate a remotely sensed constraint as done here. This will be clarified in the revised manuscript.

4) Some of the snow albedos are way too low (e.g., 0.01).

This is a result of daily averaging of snow albedo in generating the output files where the original hourly no-snow albedo was stored as zeros. The (modified BATS) snow albedo model used in the reanalysis limits snow albedo to realistic values between ~0.4-0.95. However on days where snow disappears/appears within the day there will be a mix of zero-valued (i.e. no snow albedo) and sensible snow albedo values, that when averaged can lead to what appear to be values that are “too low”. Hence, those days with snow albedo values below ~0.4 should likely be ignored in any analysis. This will be clarified in the revised manuscript and/or data documentation.

5) As the other reviewer notes, in its current form this is a data paper but the submission is listed as a "Research article." Perhaps a journal such as Earth System Science Data would be more appropriate for publication.

Please see comment in response to Reviewer #1, repeated here: The paper was originally conceived primarily as a “data paper” to emphasize the new dataset that focuses on seasonal snow over HMA. It was submitted to Earth System Science Data (ESSD) where we were told it was out of scope because it had “too much analysis” due to the inclusion of analysis of the space-time climatology of seasonal snow. Admittedly, this places this paper somewhere between a typical data paper and a more typical research article that uses existing datasets. The rationale for not including additional analysis was to maintain this paper as primarily a standalone description of a new estimate of seasonal snow climatology over HMA. Including additional analysis through an intercomparison lens will not only push this paper over the length limits, it will likely require giving short shrift to both this new dataset and the other datasets included in the intercomparison. The intercomparison paper we are currently drafting is easily a standalone paper itself and therefore merging the two will, in our opinion, water down both sets of material. Hence our preference is to keep this paper short and to the point in terms of providing a new estimate of seasonal snow climatology, while pointing the readers to the new dataset where further analysis can be performed. In the revised manuscript we will further flesh out the space-time climatology and variability of the new dataset through additional analysis.

## **Minor comments:**

### **Line 39:**

Please be more descriptive here. What's a localized scale? What's coarse scale vs. fine scale? You've missed all of our papers that focus on SWE over large basins in HIMAT:

Bair, E.H., Stillinger, T., Rittger, K., & Skiles, M. (2021). COVID-19 lockdowns show reduced pollution on snow and ice in the Indus River Basin. *Proceedings of the National Academy of Sciences*, 118, e2101174118. doi:10.1073/pnas.2101174118

Bair, E.H., Rittger, K., Ahmad, J. A., and Chabot, D. (2020): Comparison of modeled snow properties in Afghanistan, Pakistan, and Tajikistan, *The Cryosphere*, 14, 331-347, doi: 10.5194/tc-14-331-2020.

Bair, E. H., A. Abreu Calfa, K. Rittger, and J. Dozier (2018), Using machine learning for real-time estimates of snow water equivalent in the watersheds of Afghanistan, *The Cryosphere*, 12(5), 1579-1594, doi: 10.5194/tc-12-1579-2018.

As there is no universal standard for defining a 'fine scale' and 'coarse scale', we simply classify resolutions around or below 1 km as fine scale, and above 1 km as coarse scale. Similarly, for localized studies we mainly referred to research focusing on basins (including large and small basins), and for regional studies we mainly referred to research on the entire HMA. We will provide more description in the revised manuscript. The papers that you listed above are great works in the HMA domain, and we will include all of them in our revised manuscript.

### **Line 117:**

That cutoff is too high in northern HMA. For example, central Almaty KZ (el 800m) has 0.5 m of snow on the ground in January & February (<http://www.pogodaiklimat.ru/climate/36870.htm>).

Could you explain further how the cutoff value was selected, and moreover why a cutoff is needed?

The cutoff using a tile-average elevation above 1500 m was mainly chosen as a constraint on computational cost. When embarking on this study, a probabilistic snow reanalysis at this resolution/extent had not been created and computational compromises were made due to the large computational cost. It was an efficient threshold for most areas of HMA that avoided running the reanalysis at tiles with little to no seasonal snow. We acknowledge that this threshold might exclude snow in some areas of the domain and will clarify this in the revised manuscript. We anticipate that this threshold will be relaxed or removed in future versions of this product.

### **Line 147:**

Because of the monsoon, HIMAT is much cloudier than the Sierra Nevada or Andes. This is an obstacle for optical sensors.

We agree that the HMA region is much cloudier than the Sierra Nevada or Andes, where optical sensors may not provide as much information and are subject to additional errors. This limitation

has been included in our conclusion (line 390-394) and will be elaborated on in more detail in the revised manuscript.

**Line 156:**

This is a very useful study that I had not seen before, however I'm skeptical about the accuracy of the remotely-sensed snow cover ablation retrievals, especially in the monsoon-dominated parts of HIMAT. Snow cloud discrimination remains an unsolved problem (Stillinger et al 2019) that plagues MODSCAG and every other snow cover product that relies on optical sensors.

Given that the keyword "clouds" is not even mentioned in Liu and Margulis (2019), I can only assume that there are many times when clouds are mistaken for snow and vice-versa, leading to erroneous fSCA conditioning where the snow cover melts out earlier than reality or persists later.

Stillinger, T., Roberts, D. A., Collar, N. M., & Dozier, J. (2019). Cloud Masking for Landsat 8 and MODIS Terra Over Snow-Covered Terrain: Error Analysis and Spectral Similarity Between Snow and Cloud. *Water Resources Research*, 55, 6169-6184. <https://doi.org/10.1029/2019wr024932>

Here are our responses:

- 1) For the comment 'Given that the keyword "clouds" is not even mentioned in Liu and Margulis (2019) ...', we would like to first clarify that Liu and Margulis (2019) and Margulis et al. (2019) are two companion papers. Liu and Margulis (2019) is more focused on methods of snowfall parameterization, while details of fSCA processing were given in Margulis et al. (2019). Cloud screening has been performed in both Landsat and MODSCAG retrievals, as described in Margulis et al. (2019). Specifically, for Landsat, any tile with a diagnosed cloud cover fraction of greater than 40% is excluded entirely. For MODSCAG, only "near-nadir" tiles are included and, of those, any tile with a diagnosed cloud cover fraction of greater than 10% is excluded entirely. This subset of Landsat and MODSCAG tiles for inclusion therefore uses a conservative screening meant to exclude cloudy tiles. This does not prevent errors of omission/commission, but is meant to mitigate cloud impacts by not including all tiles. More detail on this will be provided in the revised manuscript.
- 2) For the comment 'I'm skeptical about the accuracy of the remotely-sensed snow cover ablation retrievals, especially in the monsoon-dominated parts of HIMAT...', we acknowledge that the accuracy of fSCA retrievals are likely not as good (or at least more subject to omission/commission errors due to clouds) in the monsoon dominated parts of HMA, which in our case excludes many more Landsat/MODSCAG measurements.
- 3) For the comment 'Snow cloud discrimination remains an unsolved problem (Stillinger et al 2019) that plagues MODSCAG and every other snow cover product that relies on optical sensors.' and 'I can only assume that there are many times when clouds are mistaken for snow and vice-versa, leading to erroneous fSCA conditioning where the snow cover melts out earlier than reality or persists later'. The general point raised regarding cloud classification problems with optical sensors is a good one and one we will highlight it in the revised manuscript. It is true that any study using estimates derived from optical sensors will be subject to some level of these errors. But here lies an important point regarding the reanalysis methodology used in this manuscript vs. other methods. In deterministic "SWE reconstruction" methods, the fSCA measurements are used directly to estimate ablation

rates, i.e., the ablation rate is effectively obtained by interpolating between measurements. This is equivalent to assuming no measurement error in fSCA (despite the known errors cited above). Such a method will directly propagate errors (including and especially those of omission/commission) to the SWE estimates. In contrast, the SWE reanalysis method used here explicitly acknowledges measurement error in the fSCA measurements used. So rather than interpolating between fSCA measurements, a reanalysis (data assimilation) approach is more akin to a least-squares fit of the data, i.e., one that acknowledges error and does not “overfit” in an interpolation sense. Hence propagation of error is reduced. The inclusion of measurement error in the form used in this manuscript (i.e., constant 10% and 15% error standard deviations for Landsat and MODSCAG respectively) is undoubtedly a simplification of the real error scenario, but the method at least allows for its acknowledgement and representation. Future versions could even attempt to include a more refined representation of these and other error types. The combination of a conservative cloud screening process (described above) and the ability to account for bulk measurement errors in the reanalysis methodology provides, in our opinion, a “best-case” mitigation of inherent cloud-based errors. More detail on this will be provided in the revised manuscript.

#### References:

- Margulis, S. A., Giroto, M., Cortés, G. and Durand, M.: A Particle Batch Smoother Approach to Snow Water Equivalent Estimation, *Journal of Hydrometeorology*, 16(4), 1752–1772, 2015.
- Margulis, S. A., Liu, Y. and Baldo, E.: A Joint Landsat- and MODIS-Based Reanalysis Approach for Midlatitude Montane Seasonal Snow Characterization, *Front. Earth Sci.*, 7, 4257, doi:10.3389/feart.2019.00272, 2019.
- Liu, Y. and Margulis, S. A.: Deriving Bias and Uncertainty in MERRA-2 Snowfall Precipitation Over High Mountain Asia, *Front. Earth Sci.*, 7, 39, doi:10.3389/feart.2019.00280, 2019.

#### **Line 173:**

According to Margulis et al (2019), the cloud screening relies on CFMask (Landsat) and the MOD09GA QA bits (MODIS). These masks have a precision of 0.70 & 0.17 and a recall of 0.86 & 0.72 (Stillinger et al. 2019). Thus, again this calls into question the accuracy of the remotely-sensed fSCA.

See responses to comments above. More detail on this will be provided in the revised manuscript.

#### **Line 180:**

The authors need to acknowledge that the cloudy images create an issue not only of missing observations, but of false positives (low precision for cloud masks) and false negatives (low recall for cloud masks) for snow detection, which in turn will create snow ablation curves that do not represent that snow cover on the ground.

See responses to comments above. Specifically, snow ablation curves are not explicitly created from the fSCA time series in the way they are for SWE reconstruction methods. Hence, as described above, these errors are mitigated using the proposed approach. More detail on this will be provided in the revised manuscript.

#### **Line 199:**

RGI is more appropriate here, as its a snapshot of glaciers around 2000 whereas GLIMS (which includes RGI) contains outlines from a much larger date range.  
This will be clarified in the revised manuscript.

**Line 221:**

Can you elaborate on how the Bayesian update process was performed on these pixels? In the User Guide at NSIDC, the authors state that these pixels are given a type 1 designation; that is having no prior simulation. A further description is warranted here.

Actually, there is no difference in the Bayesian update between ‘seasonal snow pixels’ and ‘non-seasonal snow pixels’. Estimates at both types of pixels were computed in the same way and included in the HMASR dataset. It is mainly an external mask of ‘non-seasonal snow and ice’ that we provide to the users (and ourselves), given the fact that we think the results are less accurate compared to other seasonal snow estimates. Moreover, type 1 designation was not assigned to ‘seasonal snow pixels’ or ‘non-seasonal snow pixels’ in our NSIDC documentation. Some pixels have little snowfall based on our prior simulation, and we skipped running those pixels in the reanalysis (to reduce computational expense), and assigned them as type 1.

**Line 228:**

That is in agreement with measurements and SWE reconstructions from Salang Pass in Afghanistan (35N, 69E, el 3366m), one of the few high alititude sites with snow climate records in Afghanistan (Bair et al 2018)

Bair, E. H., Abreu Calfa, A., Rittger, K., & Dozier, J. (2018). Using machine learning for real-time estimates of snow water equivalent in the watersheds of Afghanistan. *The Cryosphere*, 12, 1579-1594. <https://doi.org/10.5194/tc-12-1579-2018>

It is good to know that they are in agreement. We will add this reference to the revised manuscript.

**Line 240:**

and errors of omission and commission in cloud/snow identification

Will include in revised manuscript.

**Line 300:**

Also most studies don't mask out non-seasonal SWE. For these areas with perennial snow/ice, the computed melt should still be valid, and is likely useful for water managers. Thus, it would be useful to instead show the melt volumes including the masked areas, as just showing the seasonal SWE is misleading.

As mentioned above, there is no difference in the Bayesian update between ‘seasonal snow pixels’ and ‘non-seasonal snow pixels’. Both type of pixels were fully computed and results were included the HMASR dataset. It is mainly an external mask of ‘non-seasonal snow and ice’ that we provide to the users (and ourselves), given the fact that we think the results are less accurate compared to other seasonal snow estimates.
